# Supplementary material for: Circulating non-coding RNA-biomarker potential in neoadjuvant chemotherapy of triple negative breast cancer?
Source: PubMed Central journal article supplement — Int J Oncol. 2019 Nov 25;56(1):47–68. doi: 10.3892/ijo.2019.4920 (PMC6910196; doi:10.3892/ijo.2019.4920), 2019-11-25
Supplement: Supplementary_Data.pdf [file Supplementary_Data.pdf]

Table SI. Primer sequences of investigated ncRNAs/mRNAs.

| A, ncRNA primers |                 |                                      |
|------------------|-----------------|--------------------------------------|
| RNA              | Sense/antisense | Primer sequence                      |
| RT adapter       |                 | 5'-CAGGTCCAGTTTTTTTTTTTTTTTTXN-3'    |
| RNU-44           | Sense           | 5'-GCAGGAAGGTCTTAATTAGCTCT-3'        |
|                  | Antisense       | 5'-GTCCAGTTTTTTTTTTTTTTTTTAGTCAGT-3' |
| RNU-48           | Sense           | 5'-TCACCGCAGCGCTCT-3'                |
|                  | Antisense       | 5'-TCCAGTTTTTTTTTTTTTTTTTGGTCA-3'    |
| ath-miR-159a     | Sense           | 5'-GCGCAGTTTGGATTGAAG-3'             |
|                  | Antisense       | 5'-AGGTCCAGTTTTTTTTTTTTTTAGAG-3'     |
| cel-miR-39-3p    | Sense           | 5'-GTCACCGGGTGTAATCAG-3'             |
|                  | Antisense       | 5'-GGTCCAGTTTTTTTTTTTTTTCAAG-3'      |
| hsa-miR-16-5p    | Sense           | 5'-CGCAGTAGCAGCACGTA-3'              |
|                  | Antisense       | 5'-CAGTTTTTTTTTTTTTTTCGCCAA-3'       |
| hsa-miR-26b-5p   | Sense           | 5'-CGCAGTTCAAGTAATCAGGAT-3'          |
|                  | Antisense       | 5'-GGTCCAGTTTTTTTTTTTTTTACCT-3'      |
| hsa-miR-191-5p   | Sense           | 5'-CAACGGAATCCCAAAAGCA-3'            |
|                  | Antisense       | 5'-TCCAGTTTTTTTTTTTTTTTCAGCT-3'      |
| hsa-let-7a-5p    | Sense           | 5'-GCAGTGAGGTAGTAGGTTG-3'            |
|                  | Antisense       | 5'-GGTCCAGTTTTTTTTTTTTTTAACTATAC-3'  |
| hsa-let-7e-5p    | Sense           | 5'-GCAGTGAGGTAGGAGGTTG-3'            |
|                  | Antisense       | 5'-GGTCAAGTTTTTTTTTTTTTTAACTATAC-3'  |
| hsa-miR-7-5p     | Sense           | 5'-CGCAGTGGAAGACTAGTGA-3'            |
|                  | Antisense       | 5'-GTCCAGTTTTTTTTTTTTTTTACAACA-3'    |
| hsa-miR-9-5p     | Sense           | 5'-GCAGTCTTTGGTTATCTAGCTG-3'         |
|                  | Antisense       | 5'-GGTCCAGTTTTTTTTTTTTTTTCATAC-3'    |
| hsa-miR-15a-5p   | Sense           | 5'-CAGTAGCAGCACATAATGGTT-3'          |
|                  | Antisense       | 5'-GGTCCAGTTTTTTTTTTTTTTTCACA-3'     |
| hsa-miR-17-5p    | Sense           | 5'-GCAAAGTGCTTACAGTGCA-3'            |
|                  | Antisense       | 5'-GGTCCAGTTTTTTTTTTTTTTTCTAC-3'     |
| hsa-miR-18a-5p   | Sense           | 5'-GTAAGGTGCATCTAGTGCAG-3'           |
|                  | Antisense       | 5'-GGTCCAGTTTTTTTTTTTTTTTCTATC-3'    |
| hsa-miR-19b-3p   | Sense           | 5'-AGTGTGCAAATCCATGCA-3'             |
|                  | Antisense       | 5'-GGTCCAGTTTTTTTTTTTTTTTCAGT-3'     |
| hsa-miR-21-5p    | Sense           | 5'-GCAGTAGCTTATCAGACTGATG-3'         |
|                  | Antisense       | 5'-GGTCCAGTTTTTTTTTTTTTTTCAAC-3'     |
| hsa-miR-30b-5p   | Sense           | 5'-GCAGTGTAACATCCTACACTCA-3'         |
|                  | Antisense       | 5'-GGTCCAGTTTTTTTTTTTTTTTAGC-3'      |
| hsa-miR-222-3p   | Sense           | 5'-GCAGAGCTACATCTGGCT-3'             |
|                  | Antisense       | 5'-CCAGTTTTTTTTTTTTTTTACCAGT-3'      |
| hsa-miR-320c     | Sense           | 5'-CAGAAAAGCTGGGTTGAGA-3'            |
|                  | Antisense       | 5'-GTCCAGTTTTTTTTTTTTTTTACCCT-3'     |
| piR-hsa-36743    | Sense           | 5'-TTTCCGTAGTGTAGTGGTCA-3'           |
|                  | Antisense       | 5'-AGTTTTTTTTTTTTTTTGGCGAAC-3'       |
| GlyCCC2          | Sense           | 5'-TCAATCCCGGCCAATG-3'               |
|                  | Antisense       | 5'-GTCCAGTTTTTTTTTTTTTTTGGTG-3'      |

## B, mRNA primers

| RNA           | Sense/antisense | Primer sequence               |
|---------------|-----------------|-------------------------------|
| RT adapter    |                 | 5'-(T)12VN-3'                 |
| ALAS1         | Sense           | 5'-AGCGCAACGTCAAACCTCAT-3'    |
|               | Antisense       | 5'-TTTTAGCAGCATCTGCAACC-3'    |
| Cyclin D1     | Sense           | 5'-GGGTTGTGCTACAGATGATAGAG-3' |
|               | Antisense       | 5'-AGACGCCTCCTTTGTGTTAAT-3'   |
| TOP2 $\alpha$ | Sense           | 5'-GACGCTTCGTTATGGGAAGATA-3'  |
|               | Antisense       | 5'-GGGCCAGTTGTGATGGATAA-3'    |

Table SI. Continued.

| RNA   | Sense/antisense | Primer sequence               |
|-------|-----------------|-------------------------------|
| TPX2  | Sense           | 5'-GGCCTTTCTGGTTCTCTAGTT-3'   |
|       | Antisense       | 5'-CTTCTACCTCAGCCATTCTCTTC-3' |
| DDX5  | Sense           | 5'-CCAACAGGGACTTACCAGAATG-3'  |
|       | Antisense       | 5'-CAGCTGCAGTAGCAGGATATG-3'   |
| DDX17 | Sense           | 5'-TCAGCCAACAATCCCAATCT-3'    |
|       | Antisense       | 5'-CCAGCTCTATCGGTTTCACTAC-3'  |

ncRNA, non-coding RNA; RT, reverse transcription; miR, microRNA; piR, PIWI-interacting RNA; ALAS1, 5'-aminolevulinate synthase 1; TOP2 $\alpha$ , DNA topoisomerase 2 $\alpha$ ; TPX2, targeting protein for Xklp2; DDX, DEAD-box polypeptide; hsa, *Homo sapiens*; cel, *Caenorhabditis elegans*; ath, *Arabidopsis thaliana*.

Table SII. Chemotherapy-driven alterations of ncRNA expression in four different BC cell lines (multivariable analysis).

| Variable    | hsa-miR-let7a                    | hsa-miR-let7e                    | hsa-miR-7                        | hsa-miR-9                        | hsa-miR-15a                      | hsa-miR-17                       | hsa-miR-18a                      |
|-------------|----------------------------------|----------------------------------|----------------------------------|----------------------------------|----------------------------------|----------------------------------|----------------------------------|
| Intercept†  | 1.038<br>(0.743, 1.451)          | 0.776<br>(0.556, 1.083)          | 0.069<br>(0.050, 0.097)          | 0.017<br>(0.012, 0.023)          | 0.012<br>(0.008, 0.018)          | 1.029<br>(0.877, 1.207)          | 0.654<br>(0.493, 0.869)          |
| Control     |                                  |                                  |                                  |                                  |                                  |                                  |                                  |
| BT-474      | 0.890 (0.555, 1.429);<br>P=0.631 | 0.770 (0.480, 1.233);<br>P=0.280 | 0.158 (0.098, 0.253);<br>P<0.001 | 2.060 (1.297, 3.272);<br>P=0.003 | 1.164 (0.635, 2.131);<br>P=0.625 | 0.467 (0.373, 0.585);<br>P<0.001 | 0.399 (0.267, 0.597);<br>P<0.001 |
| HS-578T     | 3.108 (1.936, 4.988);<br>P<0.001 | 2.839 (1.772, 4.550);<br>P<0.001 | 0.159 (0.099, 0.254);<br>P<0.001 | 0.096 (0.060, 0.152);<br>P<0.001 | 0.191 (0.104, 0.350);<br>P<0.001 | 0.214 (0.171, 0.268);<br>P<0.001 | 0.122 (0.082, 0.182);<br>P<0.001 |
| MDA-MB-231  | 2.143 (1.335, 3.440);<br>P=0.002 | 2.070 (1.291, 3.317);<br>P=0.003 | 0.117 (0.073, 0.187);<br>P<0.001 | 0.121 (0.076, 0.192);<br>P<0.001 | 0.528 (0.288, 0.966);<br>P=0.042 | 0.357 (0.285, 0.448);<br>P<0.001 | 0.196 (0.131, 0.293);<br>P<0.001 |
| Carboplatin |                                  |                                  |                                  |                                  |                                  |                                  |                                  |
| BT-20       | 1.034 (0.644, 1.659);<br>P=0.891 | 1.115 (0.696, 1.787);<br>P=0.652 | 0.916 (0.572, 1.467);<br>P=0.716 | 1.022 (0.644, 1.623);<br>P=0.926 | 0.977 (0.533, 1.789);<br>P=0.940 | 0.962 (0.767, 1.205);<br>P=0.734 | 0.937 (0.627, 1.401);<br>P=0.752 |
| BT-474      | 1.030 (0.642, 1.654);<br>P=0.902 | 1.014 (0.633, 1.625);<br>P=0.955 | 0.965 (0.603, 1.546);<br>P=0.884 | 0.918 (0.578, 1.458);<br>P=0.718 | 0.926 (0.505, 1.695);<br>P=0.803 | 1.025 (0.818, 1.285);<br>P=0.830 | 1.030 (0.689, 1.539);<br>P=0.886 |
| HS-578T     | 0.940 (0.585, 1.508);<br>P=0.797 | 0.906 (0.565, 1.451);<br>P=0.681 | 1.091 (0.681, 1.748);<br>P=0.717 | 1.260 (0.793, 2.001);<br>P=0.332 | 1.310 (0.716, 2.400);<br>P=0.384 | 1.083 (0.864, 1.357);<br>P=0.492 | 1.371 (0.917, 2.050);<br>P=0.127 |
| MDA-MB-231  | 0.790 (0.492, 1.269);<br>P=0.333 | 0.779 (0.486, 1.249);<br>P=0.303 | 0.941 (0.587, 1.507);<br>P=0.801 | 0.909 (0.572, 1.443);<br>P=0.686 | 0.991 (0.541, 1.814);<br>P=0.976 | 0.960 (0.766, 1.203);<br>P=0.724 | 0.875 (0.585, 1.307);<br>P=0.516 |
| Epirubicin  |                                  |                                  |                                  |                                  |                                  |                                  |                                  |
| BT-20       | 0.745 (0.464, 1.195);<br>P=0.225 | 0.811 (0.506, 1.299);<br>P=0.386 | 0.548 (0.342, 0.878);<br>P=0.015 | 0.640 (0.403, 1.016);<br>P=0.063 | 0.496 (0.271, 0.909);<br>P=0.026 | 0.527 (0.421, 0.661);<br>P<0.001 | 0.402 (0.269, 0.600);<br>P<0.001 |
| BT-474      | 0.756 (0.471, 1.213);<br>P=0.250 | 0.759 (0.473, 1.216);<br>P=0.254 | 0.313 (0.196, 0.502);<br>P<0.001 | 0.349 (0.219, 0.554);<br>P<0.001 | 0.322 (0.176, 0.589);<br>P<0.001 | 0.427 (0.341, 0.536);<br>P<0.001 | 0.278 (0.186, 0.415);<br>P<0.001 |
| HS-578T     | 0.825 (0.514, 1.325);<br>P=0.429 | 0.829 (0.517, 1.329);<br>P=0.439 | 0.667 (0.417, 1.069);<br>P=0.097 | 0.794 (0.500, 1.261);<br>P=0.332 | 0.874 (0.477, 1.600);<br>P=0.663 | 0.701 (0.559, 0.878);<br>P=0.003 | 0.645 (0.431, 0.963);<br>P=0.035 |
| MDA-MB-231  | 0.681 (0.424, 1.093);<br>P=0.116 | 0.723 (0.451, 1.159);<br>P=0.181 | 0.357 (0.223, 0.572);<br>P<0.001 | 0.500 (0.315, 0.794);<br>P=0.005 | 0.523 (0.285, 0.957);<br>P=0.039 | (0.461, 0.725);<br>P<0.001       | 0.462 (0.309, 0.691);<br>P<0.001 |
| Gemcitabine |                                  |                                  |                                  |                                  |                                  |                                  |                                  |
| BT-20       | 0.917 (0.571, 1.472);<br>P=0.720 | 0.892 (0.556, 1.429);<br>P=0.635 | 0.677 (0.423, 1.084);<br>P=0.109 | 0.963 (0.606, 1.529);<br>P=0.873 | 0.779 (0.425, 1.426);<br>P=0.420 | 0.756 (0.603, 0.948);<br>P=0.018 | 0.648 (0.433, 0.968);<br>P=0.037 |
| BT-474      | 0.854 (0.532, 1.370);<br>P=0.514 | 0.906 (0.565, 1.452);<br>P=0.682 | 0.359 (0.224, 0.575);<br>P<0.001 | 0.239 (0.150, 0.379);<br>P<0.001 | 0.228 (0.124, 0.417);<br>P<0.001 | 0.387 (0.308, 0.485);<br>P<0.001 | 0.206 (0.138, 0.308);<br>P<0.001 |
| HS-578T     | 0.929 (0.579, 1.491);<br>P=0.760 | 0.887 (0.553, 1.421);<br>P=0.619 | 0.909 (0.567, 1.455);<br>P=0.691 | 1.000 (0.630, 1.588);<br>P>0.999 | 1.145 (0.625, 2.096);<br>P=0.663 | 1.076 (0.858, 1.348);<br>P=0.529 | 1.132 (0.757, 1.692);<br>P=0.548 |
| MDA-MB-231  | 0.920 (0.573, 1.476);<br>P=0.730 | 0.890 (0.556, 1.427);<br>P=0.630 | 0.574 (0.359, 0.920);<br>P=0.024 | 0.794 (0.500, 1.261);<br>P=0.332 | 0.894 (0.488, 1.637);<br>P=0.717 | 0.870 (0.694, 1.091);<br>P=0.231 | 0.773 (0.517, 1.156);<br>P=0.213 |

Table SII. Continued.

| Variable    | hsa-miR-let7a                    | hsa-miR-let7e                    | hsa-miR-7                        | hsa-miR-9                        | hsa-miR-15a                      | hsa-miR-17                       | hsa-miR-18a                      |
|-------------|----------------------------------|----------------------------------|----------------------------------|----------------------------------|----------------------------------|----------------------------------|----------------------------------|
| Paclitaxel  |                                  |                                  |                                  |                                  |                                  |                                  |                                  |
| BT-20       | 1.081 (0.673, 1.735);<br>P=0.749 | 1.068 (0.666, 1.711);<br>P=0.787 | 0.789 (0.493, 1.264);<br>P=0.328 | 0.846 (0.533, 1.343);<br>P=0.481 | 0.639 (0.349, 1.170);<br>P=0.152 | 0.679 (0.541, 0.850);<br>P=0.001 | 0.562 (0.376, 0.839);<br>P=0.006 |
| BT-474      | 0.961 (0.599, 1.543);<br>P=0.870 | 0.981 (0.612, 1.572);<br>P=0.936 | 0.825 (0.515, 1.321);<br>P=0.425 | 0.752 (0.474, 1.195);<br>P=0.233 | 0.693 (0.378, 1.269);<br>P=0.239 | 0.763 (0.609, 0.956);<br>P=0.021 | 0.714 (0.478, 1.068);<br>P=0.105 |
| HS-578T     | 0.932 (0.581, 1.496);<br>P=0.771 | 0.928 (0.579, 1.487);<br>P=0.756 | 1.152 (0.719, 1.845);<br>P=0.559 | 1.000 (0.630, 1.588);<br>P>0.999 | 1.000 (0.546, 1.831);<br>P>0.999 | 0.802 (0.640, 1.006);<br>P=0.059 | 0.780 (0.522, 1.167);<br>P=0.230 |
| MDA-MB-231  | 0.540 (0.336, 0.866);<br>P=0.013 | 0.582 (0.363, 0.933);<br>P=0.027 | 0.610 (0.381, 0.978);<br>P=0.044 | 0.500 (0.315, 0.794);<br>P=0.005 | 0.492 (0.269, 0.901);<br>P=0.025 | 0.586 (0.468, 0.735);<br>P<0.001 | 0.447 (0.299, 0.667);<br>P<0.001 |
| Variable    | hsa-miR-19b                      | hsa-miR-21                       | hsa-miR-30b                      | hsa-miR-222                      | hsa-miR-320c                     | piR-36743                        | GlyCCC2                          |
| Intercept†  | 1.116 (0.714, 1.745)             | 0.418 (0.324, 0.538)             | 0.219 (0.168, 0.285)             | 0.081 (0.069, 0.095)             | 0.020 (0.015, 0.027)             | 0.010 (0.007, 0.013)             | 0.008 (0.005, 0.012)             |
| Control     |                                  |                                  |                                  |                                  |                                  |                                  |                                  |
| BT-474      | 0.466 (0.247, 0.876);<br>P=0.020 | 1.194 (0.834, 1.710);<br>P=0.336 | 1.093 (0.753, 1.586);<br>P=0.642 | 0.472 (0.376, 0.592);<br>P<0.001 | 0.349 (0.224, 0.543);<br>P<0.001 | 1.302 (0.858, 1.976);<br>P=0.219 | 5.215 (2.963, 9.179);<br>P<0.001 |
| HS-578T     | 0.123 (0.066, 0.232);<br>P<0.001 | 4.509 (3.148, 6.458);<br>P<0.001 | 0.720 (0.496, 1.045);<br>P=0.088 | 0.830 (0.661, 1.041);<br>P=0.111 | 1.367 (0.879, 2.127);<br>P=0.169 | 0.554 (0.365, 0.840);<br>P=0.007 | 1.658 (0.942, 2.919);<br>P=0.083 |
| MDA-MB-231  | 0.141 (0.075, 0.265);<br>P<0.001 | 1.840 (1.285, 2.636);<br>P=0.001 | 0.812 (0.559, 1.179);<br>P=0.276 | 1.289 (1.027, 1.618);<br>P=0.031 | 0.642 (0.413, 0.999);<br>P=0.053 | 3.645 (2.402, 5.533);<br>P<0.001 | 1.726 (0.981, 3.038);<br>P=0.062 |
| Carboplatin |                                  |                                  |                                  |                                  |                                  |                                  |                                  |
| BT-20       | 0.933 (0.496, 1.756);<br>P=0.830 | 0.890 (0.621, 1.274);<br>P=0.526 | 0.977 (0.673, 1.419);<br>P=0.903 | 1.029 (0.820, 1.291);<br>P=0.805 | 1.036 (0.666, 1.611);<br>P=0.877 | 0.965 (0.636, 1.465);<br>P=0.869 | 0.860 (0.489, 1.514);<br>P=0.603 |
| BT-474      | 1.097 (0.583, 2.064);<br>P=0.775 | 0.856 (0.598, 1.226);<br>P=0.399 | 0.904 (0.623, 1.313);<br>P=0.598 | 0.986 (0.786, 1.237);<br>P=0.903 | 1.197 (0.769, 1.862);<br>P=0.428 | 1.222 (0.805, 1.856);<br>P=0.348 | 1.077 (0.612, 1.896);<br>P=0.798 |
| HS-578T     | 1.041 (0.553, 1.960);<br>P=0.900 | 1.097 (0.766, 1.571);<br>P=0.615 | 1.045 (0.720, 1.518);<br>P=0.817 | 0.935 (0.745, 1.173);<br>P=0.561 | 0.914 (0.588, 1.422);<br>P=0.691 | 1.240 (0.817, 1.882);<br>P=0.316 | 0.905 (0.514, 1.593);<br>P=0.730 |
| MDA-MB-231  | 0.865 (0.459, 1.627);<br>P=0.654 | 0.811 (0.566, 1.162);<br>P=0.258 | 0.921 (0.634, 1.337);<br>P=0.665 | 0.894 (0.713, 1.122);<br>P=0.338 | 0.907 (0.583, 1.411);<br>P=0.667 | 0.989 (0.652, 1.501);<br>P=0.959 | 0.632 (0.359, 1.113);<br>P=0.116 |
| Epirubicin  |                                  |                                  |                                  |                                  |                                  |                                  |                                  |
| BT-20       | 0.354 (0.188, 0.666);<br>P=0.002 | 0.461 (0.322, 0.660);<br>P<0.001 | 0.566 (0.390, 0.822);<br>P=0.004 | 0.608 (0.484, 0.763);<br>P<0.001 | 0.716 (0.461, 1.114);<br>P=0.143 | 0.990 (0.652, 1.502);<br>P=0.962 | 0.489 (0.278, 0.861);<br>P=0.015 |
| BT-474      | 0.254 (0.135, 0.479);<br>P<0.001 | 0.438 (0.306, 0.628);<br>P<0.001 | 0.361 (0.249, 0.524);<br>P<0.001 | 0.718 (0.572, 0.901);<br>P=0.005 | 1.151 (0.740, 1.790);<br>P=0.535 | 4.098 (2.700, 6.221);<br>P<0.001 | 0.843 (0.479, 1.484);<br>P=0.556 |
| HS-578T     | 0.571 (0.303, 1.075);<br>P=0.086 | 0.761 (0.531, 1.090);<br>P=0.140 | 0.719 (0.495, 1.044);<br>P=0.087 | 0.849 (0.677, 1.066);<br>P=0.163 | 0.857 (0.551, 1.334);<br>P=0.497 | 1.310 (0.863, 1.989);<br>P=0.208 | 0.772 (0.438, 1.358);<br>P=0.372 |
| MDA-MB-231  | 0.384 (0.204, 0.724);<br>P=0.004 | 0.304 (0.212, 0.436);<br>P<0.001 | 0.468 (0.323, 0.680);<br>P<0.001 | 0.547 (0.436, 0.686);<br>P<0.001 | 0.997 (0.641, 1.551);<br>P=0.989 | 0.547 (0.360, 0.830);<br>P=0.006 | 0.398 (0.226, 0.701);<br>P=0.002 |

Table SII. Continued.

| Variable    | hsa-miR-19b                      | hsa-miR-21                       | hsa-miR-30b                      | hsa-miR-222                      | hsa-miR-320c                     | piR-36743                          | GlyCCC2                          |
|-------------|----------------------------------|----------------------------------|----------------------------------|----------------------------------|----------------------------------|------------------------------------|----------------------------------|
| Gemcitabine |                                  |                                  |                                  |                                  |                                  |                                    |                                  |
| BT-20       | 0.584 (0.310, 1.099);<br>P=0.099 | 0.653 (0.456, 0.936);<br>P=0.023 | 0.783 (0.539, 1.136);<br>P=0.201 | 0.835 (0.665, 1.048);<br>P=0.123 | 0.814 (0.523, 1.267);<br>P=0.365 | 0.961 (0.633, 1.459);<br>P=0.854   | 0.687 (0.390, 1.210);<br>P=0.197 |
| BT-474      | 0.192 (0.102, 0.362);<br>P<0.001 | 0.290 (0.202, 0.415);<br>P<0.001 | 0.281 (0.193, 0.408);<br>P<0.001 | 0.819 (0.652, 1.027);<br>P=0.088 | 2.000 (1.286, 3.111);<br>P=0.003 | 10.707 (7.054, 16.251);<br>P<0.001 | 2.062 (1.171, 3.630);<br>P=0.014 |
| HS-578T     | 0.823 (0.438, 1.550);<br>P=0.549 | 1.100 (0.768, 1.575);<br>P=0.606 | 0.992 (0.683, 1.440);<br>P=0.966 | 0.922 (0.735, 1.157);<br>P=0.486 | 0.969 (0.623, 1.507);<br>P=0.888 | 0.685 (0.451, 1.040);<br>P=0.079   | 0.748 (0.425, 1.316);<br>P=0.316 |
| MDA-MB-231  | 0.643 (0.342, 1.210);<br>P=0.175 | 0.653 (0.456, 0.936);<br>P=0.023 | 0.879 (0.605, 1.276);<br>P=0.499 | 0.856 (0.682, 1.074);<br>P=0.183 | 1.164 (0.749, 1.811);<br>P=0.502 | 1.172 (0.772, 1.779);<br>P=0.458   | 0.693 (0.394, 1.220);<br>P=0.208 |
| Paclitaxel  |                                  |                                  |                                  |                                  |                                  |                                    |                                  |
| BT-20       | 0.469 (0.249, 0.882);<br>P=0.021 | 0.661 (0.462, 0.947);<br>P=0.027 | 0.803 (0.553, 1.166);<br>P=0.253 | 1.172 (0.934, 1.470);<br>P=0.175 | 1.104 (0.710, 1.717);<br>P=0.663 | 1.899 (1.251, 2.883);<br>P=0.003   | 0.687 (0.390, 1.210);<br>P=0.197 |
| BT-474      | 0.660 (0.351, 1.242);<br>P=0.201 | 0.804 (0.561, 1.151);<br>P=0.237 | 0.696 (0.479, 1.010);<br>P=0.060 | 0.905 (0.721, 1.136);<br>P=0.392 | 1.145 (0.736, 1.781);<br>P=0.550 | 1.360 (0.896, 2.064);<br>P=0.153   | 0.774 (0.440, 1.362);<br>P=0.377 |
| HS-578T     | 0.644 (0.342, 1.212);<br>P=0.177 | 1.003 (0.701, 1.437);<br>P=0.985 | 0.740 (0.510, 1.075);<br>P=0.118 | 1.220 (0.972, 1.531);<br>P=0.090 | 0.874 (0.562, 1.360);<br>P=0.552 | 1.793 (1.181, 2.721);<br>P=0.008   | 0.701 (0.398, 1.234);<br>P=0.222 |
| MDA-MB-231  | 0.361 (0.192, 0.680);<br>P=0.002 | 0.412 (0.287, 0.589);<br>P<0.001 | 0.405 (0.279, 0.588);<br>P<0.001 | 0.783 (0.624, 0.983);<br>P=0.038 | 1.168 (0.751, 1.816);<br>P=0.493 | 2.922 (1.925, 4.435);<br>P<0.001   | 0.772 (0.438, 1.358);<br>P=0.372 |

Entries represent regression coefficients, and the lower and upper limits of their 95% confidence intervals. P-values refer to the statistical significance of the impact of the variable in the row to the endpoint in the column. P<0.05 indicates a statistically significant difference. BC, breast cancer; ncRNA, non-coding RNA; miR, microRNA; piR, piRNA-interacting RNA.

Table SIII. Chemotherapy-driven alterations of secreted microvesicular ncRNA expression levels in four different BC cell lines (multivariable analysis).

| A, Main effects of cell line and two-way interactions |                                    |                                     |                                      |                                  |                                     |                                  |                                   |
|-------------------------------------------------------|------------------------------------|-------------------------------------|--------------------------------------|----------------------------------|-------------------------------------|----------------------------------|-----------------------------------|
| Variable                                              | hsa-miR-let7a                      | hsa-miR-let7e                       | hsa-miR-7                            | hsa-miR-9                        | hsa-miR-15a                         | hsa-miR-17                       | hsa-miR-18a                       |
| Intercept†<br>Control (extra.)                        | 1.038 (0.743, 1.451)               | 0.776 (0.556, 1.083)                | 0.069 (0.050, 0.097)                 | 0.017 (0.012, 0.023)             | 0.012 (0.008, 0.018)                | 1.029 (0.877, 1.207)             | 0.654 (0.493, 0.869)              |
| BT-20                                                 | 5.307 (3.306, 8.520);<br>P<0.001   | 6.066 (3.785, 9.722);<br>P<0.001    | 5.908 (3.689, 9.464);<br>P<0.001     | 0.668 (0.420, 1.060);<br>P=0.092 | 11.442 (6.248, 20.953);<br>P<0.001  | 3.524 (2.812, 4.417);<br>P<0.001 | 3.919 (2.622, 5.857);<br>P<0.001  |
| BT-474                                                | 10.367 (6.458, 16.642);<br>P<0.001 | 16.873 (10.529, 27.040);<br>P<0.001 | 68.780 (42.940, 110.171);<br>P<0.001 | 1.162 (0.732, 1.84);<br>P=0.526  | 1.735 (0.947, 3.177);<br>P=0.079    | 5.858 (4.674, 7.341);<br>P<0.001 | 5.002 (3.347, 7.477);<br>P<0.001  |
| HS-578T                                               | 3.757 (2.340, 6.031);<br>P<0.001   | 5.437 (3.393, 8.7139);<br>P<0.001   | 19.584 (12.226, 31.369);<br>P<0.001  | NA                               | 19.601 (10.703, 35.895);<br>P<0.001 | 2.997 (2.391, 3.756);<br>P<0.001 | 8.127 (5.438, 12.147);<br>P<0.001 |
| MDA-MB-231                                            | 1.291 (0.804, 2.072);<br>P=0.294   | 1.315 (0.820, 2.107);<br>P=0.259    | NA                                   | NA                               | NA                                  | 2.716 (2.167, 3.404);<br>P<0.001 | 4.352 (2.912, 6.505);<br>P<0.001  |
| Treatment (extra.)                                    |                                    |                                     |                                      |                                  |                                     |                                  |                                   |
| Carboplatin                                           | 1.354 (0.693, 2.644);<br>P=0.378   | 1.351 (0.694, 2.633);<br>P=0.379    | 1.136 (0.583, 2.211);<br>P=0.709     | 1.649 (0.857, 3.171);<br>P=0.139 | 0.654 (0.278, 1.538);<br>P=0.334    | 0.745 (0.541, 1.025);<br>P=0.074 | 0.970 (0.549, 1.712);<br>P=0.915  |
| Epirubicin                                            | 2.781 (1.424, 5.431);<br>P=0.004   | 2.518 (1.293, 4.907);<br>P=0.008    | 1.722 (0.885, 3.353);<br>P=0.114     | 2.066 (1.074, 3.975);<br>P=0.034 | 1.134 (0.482, 2.667);<br>P=0.775    | 1.298 (0.943, 1.786);<br>P=0.113 | 2.013 (1.140, 3.554);<br>P=0.018  |
| Gemcitabine                                           | 2.384 (1.221, 4.656);<br>P=0.013   | 2.646 (1.358, 5.154);<br>P=0.005    | 1.571 (0.807, 3.058);<br>P=0.188     | 1.956 (1.017, 3.763);<br>P=0.049 | 0.595 (0.253, 1.400);<br>P=0.239    | 0.851 (0.619, 1.172);<br>P=0.327 | 1.108 (0.628, 1.956);<br>P=0.724  |
| Paclitaxel                                            | 1.947 (0.997, 3.803);<br>P=0.055   | 2.112 (1.084, 4.116);<br>P=0.031    | 1.184 (0.608, 2.306);<br>P=0.621     | 3.036 (1.578, 5.840);<br>P=0.002 | 0.994 (0.422, 2.338);<br>P=0.989    | 0.740 (0.538, 1.019);<br>P=0.068 | 1.083 (0.614, 1.913);<br>P=0.783  |
| B, Three-way interactions                             |                                    |                                     |                                      |                                  |                                     |                                  |                                   |
| Variable                                              | hsa-miR-let7a                      | hsa-miR-let7e                       | hsa-miR-7                            | hsa-miR-9                        | hsa-miR-15a                         | hsa-miR-17                       | hsa-miR-18a                       |
| Carboplatin (extra.)                                  |                                    |                                     |                                      |                                  |                                     |                                  |                                   |
| BT-474                                                | 0.700 (0.272, 1.805);<br>P=0.463   | 0.817 (0.318, 2.099);<br>P=0.676    | 1.053 (0.410, 2.701);<br>P=0.915     | 0.518 (0.206, 1.308);<br>P=0.169 | 1.565 (0.467, 5.250);<br>P=0.470    | 1.253 (0.798, 1.969);<br>P=0.330 | 0.992 (0.444, 2.216);<br>P=0.985  |
| HS-578T                                               | 0.993 (0.385, 2.558);<br>P=0.988   | 1.010 (0.393, 2.595);<br>P=0.983    | 1.477 (0.576, 3.790);<br>P=0.420     | NA                               | 0.534 (0.159, 1.790);<br>P=0.313    | 1.008 (0.642, 1.583);<br>P=0.972 | 0.710 (0.318, 1.586);<br>P=0.406  |
| MDA-MB-231                                            | 1.670 (0.648, 4.302);<br>P=0.292   | 1.752 (0.682, 4.499);<br>P=0.248    | NA                                   | NA                               | NA                                  | 1.199 (0.763, 1.882);<br>P=0.434 | 0.930 (0.416, 2.078);<br>P=0.860  |
| Epirubicin (extra.)                                   |                                    |                                     |                                      |                                  |                                     |                                  |                                   |
| BT-474                                                | 0.573 (0.222, 1.477);<br>P=0.252   | 0.633 (0.247, 1.627);<br>P=0.346    | 0.577 (0.225, 1.480);<br>P=0.256     | 0.907 (0.360, 2.289);<br>P=0.838 | 6.349 (1.893, 21.294);<br>P=0.004   | 1.627 (1.036, 2.556);<br>P=0.038 | 1.772 (0.793, 3.958);<br>P=0.167  |
| HS-578T                                               | 0.852 (0.331, 2.196);<br>P=0.742   | 0.882 (0.344, 2.266);<br>P=0.795    | 0.866 (0.338, 2.223);<br>P=0.766     | NA                               | 0.389 (0.116, 1.305);<br>P=0.131    | 0.993 (0.632, 1.559);<br>P=0.975 | 0.700 (0.313, 1.564);<br>P=0.387  |

Table SIII. Continued.

| Variable             | hsa-miR-let7a                    | hsa-miR-let7e                    | hsa-miR-7                        | hsa-miR-9                        | hsa-miR-15a                        | hsa-miR-17                       | hsa-miR-18a                       |
|----------------------|----------------------------------|----------------------------------|----------------------------------|----------------------------------|------------------------------------|----------------------------------|-----------------------------------|
| MDA-MB-231           | 0.782 (0.303, 2.015);<br>P=0.612 | 0.806 (0.314, 2.070);<br>P=0.655 | NA                               | NA                               | NA                                 | 1.201 (0.764, 1.886);<br>P=0.430 | 0.840 (0.376, 1.877);<br>P=0.673  |
| Gemcitabine (extra.) |                                  |                                  |                                  |                                  |                                    |                                  |                                   |
| BT-474               | 0.507 (0.197, 1.306);<br>P=0.163 | 0.439 (0.171, 1.126);<br>P=0.091 | 0.548 (0.214, 1.406);<br>P=0.215 | 1.472 (0.584, 3.713);<br>P=0.416 | 17.930 (5.346, 60.135);<br>P<0.001 | 2.959 (1.884, 4.648);<br>P<0.001 | 4.968 (2.224, 11.099);<br>P<0.001 |
| HS-578T              | 0.357 (0.139, 0.920);<br>P=0.036 | 0.337 (0.131, 0.866);<br>P=0.027 | 2.280 (0.889, 5.851);<br>P=0.091 | NA                               | 1.372 (0.394, 4.778);<br>P=0.620   | 0.743 (0.473, 1.168);<br>P=0.202 | 0.314 (0.141, 0.701);<br>P=0.006  |
| MDA-MB-231           | 0.523 (0.203, 1.348);<br>P=0.183 | 0.485 (0.189, 1.245);<br>P=0.136 | NA                               | NA                               | NA                                 | 1.168 (0.744, 1.835);<br>P=0.502 | 1.230 (0.550, 2.747);<br>P=0.616  |
| Paclitaxel (extra.)  |                                  |                                  |                                  |                                  |                                    |                                  |                                   |
| BT-474               | 0.742 (0.288, 1.913);<br>P=0.539 | 0.672 (0.262, 1.726);<br>P=0.411 | 0.668 (0.260, 1.714);<br>P=0.404 | 0.332 (0.132, 0.837);<br>P=0.023 | 2.133 (0.636, 7.152);<br>P=0.224   | 1.549 (0.987, 2.434);<br>P=0.061 | 1.120 (0.501, 2.503);<br>P=0.783  |
| HS-578T              | 0.590 (0.229, 1.521);<br>P=0.278 | 0.559 (0.218, 1.437);<br>P=0.231 | 0.620 (0.242, 1.591);<br>P=0.323 | NA                               | 0.975 (0.291, 3.268);<br>P=0.967   | 1.419 (0.903, 2.229);<br>P=0.133 | 0.982 (0.440, 2.194);<br>P=0.965  |
| MDA-MB-231           | 1.360 (0.528, 3.504);<br>P=0.526 | 1.069 (0.416, 2.746);<br>P=0.890 | NA                               | NA                               | NA                                 | 2.887 (1.838, 4.535);<br>P<0.001 | 2.009 (0.899, 4.489);<br>P=0.093  |

Table SIII (continued).

## A, Main effects of cell line and two-way interactions

| Variable           | hsa-miR-19b                      | hsa-miR-21                         | hsa-miR-30b                      | hsa-miR-222                         | hsa-miR-320c                           | piR-36743                            | GlyCCC2                            |
|--------------------|----------------------------------|------------------------------------|----------------------------------|-------------------------------------|----------------------------------------|--------------------------------------|------------------------------------|
| Intercept†         | 1.116 (0.714, 1.745)             | 0.418 (0.324, 0.538)               | 0.219 (0.168, 0.285)             | 0.081 (0.069, 0.095)                | 0.020 (0.015, 0.027)                   | 0.010 (0.007, 0.013)                 | 0.008 (0.005, 0.012)               |
| Control (extra.)   |                                  |                                    |                                  |                                     |                                        |                                      |                                    |
| BT-20              | 1.389 (0.738, 2.614);<br>P=0.312 | 10.375 (7.244, 14.860);<br>P<0.001 | 1.019 (0.702, 1.480);<br>P=0.921 | 12.308 (9.808, 15.445);<br>P<0.001  | 87.474 (56.235, 136.067);<br>P<0.001   | 88.704 (58.440, 134.641);<br>P<0.001 | 4.642 (2.637, 8.170);<br>P<0.001   |
| BT-474             | 4.566 (2.426, 8.594);<br>P<0.001 | 4.639 (3.239, 6.644);<br>P<0.001   | 1.405 (0.967, 2.039);<br>P=0.078 | 13.459 (10.726, 16.889);<br>P<0.001 | 226.237 (145.443, 351.914);<br>P<0.001 | 30.044 (19.794, 45.604);<br>P<0.001  | 6.075 (3.451, 10.693);<br>P<0.001  |
| HS-578T            | 1.215 (0.645, 2.286);<br>P=0.548 | 10.170 (7.100, 14.566);<br>P<0.001 | 0.974 (0.671, 1.414);<br>P=0.890 | 25.962 (20.689, 32.578);<br>P<0.001 | 26.118 (16.790, 40.626);<br>P<0.001    | 7.828 (5.158, 11.883);<br>P<0.001    | 11.634 (6.609, 20.479);<br>P<0.001 |
| MDA-MB-231         | 3.339 (1.774, 6.285);<br>P<0.001 | 7.719 (5.389, 11.056);<br>P<0.001  | 1.105 (0.761, 1.604);<br>P=0.602 | 12.954 (10.323, 16.255);<br>P<0.001 | 21.684 (13.940, 33.730);<br>P<0.001    | 2.420 (1.594, 3.674);<br>P<0.001     | 10.645 (6.048, 18.738);<br>P<0.001 |
| Treatment (extra.) |                                  |                                    |                                  |                                     |                                        |                                      |                                    |
| Carboplatin        | 0.481 (0.197, 1.177);<br>P=0.113 | 1.378 (0.829, 2.291);<br>P=0.219   | 0.856 (0.505, 1.451);<br>P=0.565 | 0.929 (0.674, 1.280);<br>P=0.653    | 1.485 (0.795, 2.774);<br>P=0.218       | 0.798 (0.443, 1.441);<br>P=0.457     | 0.722 (0.325, 1.607);<br>P=0.428   |



Table SIII. C continued.

| Variable                         | hsa-miR-19b                        | hsa-miR-21                       | hsa-miR-30b                       | hsa-miR-222                      | hsa-miR-320c                     | piR-36743                         | GlyCCC2                          |
|----------------------------------|------------------------------------|----------------------------------|-----------------------------------|----------------------------------|----------------------------------|-----------------------------------|----------------------------------|
| Epirubicin                       | 1.921 (0.786, 4.699);<br>P=0.156   | 2.106 (1.267, 3.501);<br>P=0.005 | 1.966 (1.160, 3.331);<br>P=0.014  | 1.145 (0.831, 1.579);<br>P=0.411 | 1.455 (0.779, 2.718);<br>P=0.243 | 0.638 (0.354, 1.151);<br>P=0.139  | 0.710 (0.319, 1.579);<br>P=0.404 |
| Gemcitabine                      | 0.642 (0.263, 1.571);<br>P=0.335   | 1.583 (0.952, 2.631);<br>P=0.080 | 0.923 (0.545, 1.564);<br>P=0.768  | 1.078 (0.782, 1.487);<br>P=0.646 | 2.016 (1.079, 3.765);<br>P=0.031 | 0.564 (0.313, 1.018);<br>P=0.061  | 0.834 (0.375, 1.855);<br>P=0.657 |
| Paclitaxel                       | 1.502 (0.614, 3.672);<br>P=0.376   | 1.146 (0.689, 1.904);<br>P=0.601 | 1.992 (1.176, 3.375);<br>P=0.012  | 0.625 (0.453, 0.861);<br>P=0.005 | 0.682 (0.365, 1.273);<br>P=0.233 | 0.248 (0.137, 0.447);<br>P<0.001  | 0.718 (0.323, 1.597);<br>P=0.419 |
| <b>B, Three-way interactions</b> |                                    |                                  |                                   |                                  |                                  |                                   |                                  |
| Variable                         | hsa-miR-19b                        | hsa-miR-21                       | hsa-miR-30b                       | hsa-miR-222                      | hsa-miR-320c                     | piR-36743                         | GlyCCC2                          |
| <b>Carboplatin (extra.)</b>      |                                    |                                  |                                   |                                  |                                  |                                   |                                  |
| BT-474                           | 1.890 (0.533, 6.694);<br>P=0.327   | 0.891 (0.434, 1.829);<br>P=0.755 | 1.172 (0.556, 2.471);<br>P=0.678  | 1.157 (0.735, 1.821);<br>P=0.53  | 0.578 (0.239, 1.399);<br>P=0.228 | 1.077 (0.467, 2.480);<br>P=0.863  | 1.511 (0.488, 4.681);<br>P=0.476 |
| HS-578T                          | 1.235 (0.349, 4.373);<br>P=0.745   | 0.737 (0.359, 1.512);<br>P=0.408 | 0.901 (0.427, 1.899);<br>P=0.785  | 1.149 (0.730, 1.810);<br>P=0.550 | 1.073 (0.444, 2.597);<br>P=0.875 | 2.005 (0.870, 4.620);<br>P=0.106  | 1.169 (0.377, 3.623);<br>P=0.787 |
| MDA-MB-231                       | 1.143 (0.323, 4.048);<br>P=0.837   | 1.194 (0.582, 2.449);<br>P=0.630 | 0.728 (0.345, 1.535);<br>P=0.407  | 0.806 (0.512, 1.269);<br>P=0.353 | 1.149 (0.475, 2.780);<br>P=0.759 | 0.910 (0.395, 2.096);<br>P=0.825  | 0.770 (0.248, 2.385);<br>P=0.651 |
| <b>Epirubicin (extra.)</b>       |                                    |                                  |                                   |                                  |                                  |                                   |                                  |
| BT-474                           | 3.238 (0.914, 11.470);<br>P=0.072  | 1.295 (0.631, 2.657);<br>P=0.482 | 3.667 (1.740, 7.730);<br>P=0.001  | 0.679 (0.431, 1.070);<br>P=0.099 | 0.307 (0.127, 0.744);<br>P=0.011 | 0.359 (0.156, 0.827);<br>P=0.018  | 3.010 (0.971, 9.325);<br>P=0.060 |
| HS-578T                          | 0.482 (0.136, 1.707);<br>P=0.261   | 0.682 (0.332, 1.399);<br>P=0.299 | 0.689 (0.327, 1.453);<br>P=0.331  | 0.793 (0.503, 1.248);<br>P=0.319 | 1.059 (0.437, 2.561);<br>P=0.900 | 2.662 (1.156, 6.134);<br>P=0.024  | 1.422 (0.459, 4.406);<br>P=0.543 |
| MDA-MB-231                       | 0.368 (0.104, 1.305);<br>P=0.126   | 2.311 (1.127, 4.741);<br>P=0.025 | 0.745 (0.353, 1.569);<br>P=0.440  | 1.601 (1.017, 2.521);<br>P=0.046 | 1.379 (0.570, 3.336);<br>P=0.478 | 2.096 (0.910, 4.829);<br>P=0.086  | 2.851 (0.920, 8.832);<br>P=0.073 |
| <b>Gemcitabine (extra.)</b>      |                                    |                                  |                                   |                                  |                                  |                                   |                                  |
| BT-474                           | 13.483 (3.806, 47.760);<br>P<0.001 | 2.549 (1.243, 5.230);<br>P=0.013 | 9.023 (4.281, 19.019);<br>P<0.001 | 0.721 (0.458, 1.136);<br>P=0.162 | 0.127 (0.052, 0.307);<br>P<0.001 | 0.178 (0.077, 0.409);<br>P<0.001  | 1.709 (0.551, 5.294);<br>P=0.356 |
| HS-578T                          | 1.492 (0.405, 5.495);<br>P=0.549   | 0.443 (0.216, 0.909);<br>P=0.029 | 0.516 (0.245, 1.088);<br>P=0.086  | 0.901 (0.572, 1.419);<br>P=0.653 | 0.758 (0.313, 1.833);<br>P=0.540 | 6.318 (2.742, 14.556);<br>P<0.001 | 2.390 (0.772, 7.406);<br>P=0.135 |
| MDA-MB-231                       | 1.765 (0.498, 6.254);<br>P=0.381   | 1.245 (0.607, 2.554);<br>P=0.551 | 1.287 (0.610, 2.712);<br>P=0.509  | 0.777 (0.494, 1.224);<br>P=0.280 | 0.490 (0.203, 1.186);<br>P=0.118 | 1.940 (0.842, 4.469);<br>P=0.124  | 1.297 (0.419, 4.020);<br>P=0.653 |
| <b>Paclitaxel (extra.)</b>       |                                    |                                  |                                   |                                  |                                  |                                   |                                  |
| BT-474                           | 0.824 (0.233, 2.919);<br>P=0.765   | 1.148 (0.560, 2.356);<br>P=0.707 | 0.945 (0.448, 1.992);<br>P=0.882  | 1.550 (0.984, 2.441);<br>P=0.062 | 1.119 (0.462, 2.707);<br>P=0.804 | 1.831 (0.795, 4.219);<br>P=0.159  | 1.029 (0.332, 3.187);<br>P=0.961 |
| HS-578T                          | 1.308 (0.369, 4.633);<br>P=0.679   | 0.741 (0.361, 1.521);<br>P=0.417 | 0.972 (0.461, 2.049);<br>P=0.941  | 1.068 (0.678, 1.681);<br>P=0.778 | 1.999 (0.826, 4.836);<br>P=0.128 | 3.492 (1.516, 8.045);<br>P=0.004  | 1.840 (0.594, 5.701);<br>P=0.294 |



Table SIII. Continued.

| Variable   | hsa-miR-19b                    | hsa-miR-21                    | hsa-miR-30b                   | hsa-miR-222                   | hsa-miR-320c                  | piR-36743                     | GlyCCC2                       |
|------------|--------------------------------|-------------------------------|-------------------------------|-------------------------------|-------------------------------|-------------------------------|-------------------------------|
| MDA-MB-231 | 3.965 (1.119, 14.046); P=0.036 | 1.325 (0.646, 2.719); P=0.445 | 1.198 (0.568, 2.525); P=0.637 | 0.882 (0.560, 1.389); P=0.589 | 0.912 (0.377, 2.208); P=0.839 | 2.428 (1.054, 5.593); P=0.040 | 0.277 (0.089, 0.859); P=0.029 |

Entries represent regression coefficients, and the lower and upper limits of their 95% confidence intervals. P-values refer to the statistical significance of the impact of the variable in the row to the endpoint in the column. P<0.05 indicates a statistically significant difference. Extra, extracellular; NA, no reliably detectable ncRNA expression; BC, breast cancer; ncRNA, non-coding RNA; miR, microRNA; piR, PIWI-interacting RNA.

Table SIV. Chemotherapy-driven alterations of mRNA expression in four different BC cell lines (multivariable analysis).

| Variable    | DDX5                             | DDX17                                         | Cyclin D1                        | TOP2 $\alpha$                    | TPX2                             |
|-------------|----------------------------------|-----------------------------------------------|----------------------------------|----------------------------------|----------------------------------|
| Intercept†  | 4.326 (3.049, 5.603)             | 0.839 (0.763, 0.914)                          | 0.191 (-0.301, 0.683)            | 1.518 (1.324, 1.713)             | 1.001 (0.904, 1.098)             |
| Control     |                                  |                                               |                                  |                                  |                                  |
| BT-474      | 0.464 (-1.342, 2.270); P=0.617   | -0.192 (-0.299, -0.085); P=0.001              | 1.672 (0.976, 2.368); P<0.001    | 0.935 (0.660, 1.210); P<0.001    | 0.188 (0.051, 0.325); P=0.010    |
| HS-578T     | -0.153 (-1.959, 1.652); P=0.869  | 0.064 (-0.043, 0.170); P=0.248                | 2.897 (2.201, 3.593); P<0.001    | 0.359 (0.084, 0.634); P=0.014    | -0.067 (-0.204, 0.070); P=0.346  |
| MDA-MB-231  | 1.792 (-0.013, 3.598); P=0.059   | -0.379 (0.486, 0.273); P<0.001                | 1.455 (0.760, 2.151); P<0.001    | 0.582 (0.307, 0.857); P<0.001    | 0.415 (0.278, 0.552); P<0.001    |
| Carboplatin |                                  |                                               |                                  |                                  |                                  |
| BT-20       | -0.080 (-1.886, 1.725); P=0.931  | 0.082 (-0.024, 0.189); P=0.138                | 0.032 (-0.663, 0.728); P=0.928   | 0.059 (-0.216, 0.334); P=0.678   | 0.000 (-0.137, 0.137); P>0.999   |
| BT-474      | -0.627 (-2.433, 1.179); P=0.500  | -0.040 (-0.147, 0.066); P=0.462               | -0.087 (-0.783, 0.608); P=0.807  | -0.178 (-0.453, 0.097); P=0.213  | -0.068 (-0.205, 0.069); P=0.339  |
| HS-578T     | -0.503 (-2.309, 1.303); P=0.588  | -0.133 (-0.240, -0.027); P=0.019              | -0.522 (-1.217, 0.174); P=0.149  | -0.296 (-0.571, -0.021); P=0.041 | -0.107 (-0.244, 0.030); P=0.134  |
| MDA-MB-231  | 0.001 (-1.805, 1.807); P=0.999   | 0.068 (-0.039, 0.175); P=0.218                | 0.129 (-0.567, 0.825); P=0.718   | -0.051 (-0.326, 0.224); P=0.720  | -0.123 (-0.260, 0.014); P=0.087  |
| Epirubicin  |                                  |                                               |                                  |                                  |                                  |
| BT-20       | 4.402 (2.597, 6.208); P<0.001    | -0.740 (-0.846, -0.633); P<0.001              | 0.002 (-0.694, 0.697); P=0.996   | -0.249 (-0.524, 0.026); P=0.083  | -0.502 (-0.639, -0.365); P<0.001 |
| BT-474      | 0.283 (-1.523, 2.088); P=0.761   | -0.502 (-0.609, -0.395); P<0.001              | -1.364 (-2.060, -0.668); P<0.001 | -1.277 (-1.552, -1.002); P<0.001 | -0.128 (-0.265, 0.009); P=0.075  |
| HS-578T     | 1.463 (-0.343, 3.269); P=0.120   | -0.254 (-0.361, -0.148); P<0.001              | -0.960 (-1.656, -0.265); P=0.010 | -0.980 (-1.255, -0.705); P<0.001 | -0.580 (-0.717, -0.443); P<0.001 |
| MDA-MB-231  | 6.693 (4.887, 8.498); P<0.001    | -0.257 (-0.363, -0.150); P<0.001              | 0.050 (-0.646, 0.746); P=0.889   | -0.384 (-0.659, -0.109); P=0.009 | -0.473 (-0.610, -0.336); P<0.001 |
| Gemcitabine |                                  |                                               |                                  |                                  |                                  |
| BT-20       | -1.075 (-2.881, 0.731); P=0.250  | -0.474 (-0.581, -0.367); P<0.001              | -0.034 (-0.730, 0.662); P=0.924  | -0.558 (-0.833, -0.283); P<0.001 | -0.481 (-0.618, -0.344); P<0.001 |
| BT-474      | -2.019 (-3.824, -0.213); P=0.034 | -0.503 (-0.610, -0.396); P<0.001              | -1.195 (-1.891, -0.499); P=0.002 | -1.980 (-2.255, -1.705); P<0.001 | -0.414 (-0.551, -0.277); P<0.001 |
| HS-578T     | -0.977 (-2.783, 0.829); P=0.295  | -0.370 (-0.477, -0.264); P<0.001              | -1.879 (-2.574, -1.183); P<0.001 | -0.518 (-0.793, -0.243); P=0.001 | -0.391 (-0.528, -0.254); P<0.001 |
| MDA-MB-231  | -0.627 (-2.433, 1.178); P=0.500  | -0.110 (-0.217, -0.004); P=0.049              | -0.893 (-1.589, -0.197); P=0.016 | -0.571 (-0.846, -0.296); P<0.001 | -0.413 (-0.550, -0.276); P<0.001 |
| Paclitaxel  |                                  |                                               |                                  |                                  |                                  |
| BT-20       | -0.588 (-2.394, 1.217); P=0.527  | 0.011 (-0.095, 0.118); P=0.836                | -0.037 (-0.733, 0.659); P=0.917  | -0.438 (-0.713, -0.163); P=0.003 | -0.104 (-0.241, 0.033); P=0.146  |
| BT-474      | -1.100 (-2.905, 0.706); P=0.240  | -0.099 (-0.205, 0.008); P=0.077               | -0.276 (-0.971, 0.420); P=0.442  | -0.529 (-0.804, -0.254); P=0.001 | -0.031 (-0.168, 0.106); P=0.001  |
| HS-578T     | -0.180 (-1.985, 1.626); P=0.846  | -0.079 (-0.186, 0.027); P=0.152               | -1.006 (-1.701, -0.310); P=0.007 | -0.576 (-0.851, -0.301); P<0.001 | 0.253 (0.116, 0.390); P<0.001    |
| MDA-MB-231  | -0.968 (-2.774, 0.838); P=0.300  | -0.157 (-0.263, -0.050); P=0.006 <sup>a</sup> | -0.704 (-1.399, -0.008); P=0.054 | -1.158 (-1.433, -0.883); P<0.001 | -0.462 (-0.599, -0.325); P<0.001 |

Entries represent regression coefficients, and the lower and upper limits of their 95% confidence intervals. P-values refer to the statistical significance of the impact of the variable in the row to the endpoint in the column. P<0.05 indicates a statistically significant difference. BC, breast cancer; DDX, DEAD-box polypeptide; TOP2 $\alpha$ , DNA topoisomerase 2 $\alpha$ ; TPX2, targeting protein for Xklp2.
